# Supplementary material for: CoRAL accurately resolves extrachromosomal DNA genome structures with long-read sequencing
Source: Genome Res. 2024 Sep;34(9):1344–54. doi: 10.1101/gr.279131.124 (PMC11529860; doi:10.1101/gr.279131.124)
Supplement: Supplement 1 [file Supplemental_Table_S2.xlsx]

## Sheet: Simulated test datasets
Supplemental Table S2: Summary of the 50 test datasets used to benchmark CoRAL against AmpliconArchitect and Decoil, including their correspondence with the simulated ecDNA amplicons.
Sample	Amplicon	Whole genome sequencing depth	Amplicon Coverage	Estimated ecDNA copy number (*)
test1	chromothripsis_bp5_amplicon3	13.4	50	7.46
test2	episomal_bp10_amplicon5	13.38	100	14.95
test2	episomal_bp5_amplicon2	13.38	50	7.47
test2	chromothripsis_bp3_amplicon4	13.38	100	14.95
test3	foldback_bp20_amplicon3	13.37	100	14.96
test3	foldback_bp1_amplicon3	13.37	250	37.4
test4	episomal_bp1_amplicon2	13.4	50	7.46
test5	foldback_bp3_amplicon1	13.39	50	7.47
test5	episomal_bp5_amplicon1	13.39	100	14.94
test6	chromothripsis_bp10_amplicon2	13.39	250	37.34
test6	foldback_bp3_amplicon1	13.39	100	14.94
test6	episomal_bp20_amplicon2	13.39	100	14.94
test6	episomal_bp5_amplicon1	13.39	250	37.34
test7	foldback_bp3_amplicon1	13.4	100	14.93
test7	chromothripsis_bp20_amplicon5	13.4	250	37.31
test8	chromothripsis_bp5_amplicon5	13.38	50	7.47
test8	episomal_bp20_amplicon2	13.38	250	37.37
test8	chromothripsis_bp3_amplicon2	13.38	100	14.95
test9	foldback_bp20_amplicon3	13.38	50	7.47
test9	foldback_bp5_amplicon3	13.38	250	37.37
test9	foldback_bp20_amplicon5	13.38	250	37.37
test10	episomal_bp20_amplicon2	13.4	250	37.31
test11	chromothripsis_bp1_amplicon3	13.4	250	37.31
test11	chromothripsis_bp5_amplicon3	13.4	50	7.46
test11	episomal_bp10_amplicon5	13.4	250	37.31
test12	chromothripsis_bp10_amplicon2	13.4	100	14.93
test13	episomal_bp20_amplicon1	13.38	50	7.47
test14	episomal_bp1_amplicon4	13.37	50	7.48
test14	episomal_bp1_amplicon3	13.37	250	37.4
test14	chromothripsis_bp3_amplicon5	13.37	250	37.4
test15	chromothripsis_bp3_amplicon1	13.4	50	7.46
test16	foldback_bp1_amplicon1	13.37	50	7.48
test16	chromothripsis_bp5_amplicon1	13.37	100	14.96
test16	episomal_bp3_amplicon3	13.37	50	7.48
test17	chromothripsis_bp3_amplicon2	13.4	100	14.93
test17	foldback_bp20_amplicon1	13.4	100	14.93
test18	foldback_bp1_amplicon5	13.4	100	14.93
test19	foldback_bp3_amplicon5	13.4	250	37.31
test19	foldback_bp10_amplicon2	13.4	250	37.31
test19	episomal_bp5_amplicon2	13.4	100	14.93
test19	foldback_bp5_amplicon5	13.4	250	37.31
test19	episomal_bp5_amplicon3	13.4	50	7.46
test19	chromothripsis_bp1_amplicon5	13.4	100	14.93
test20	foldback_bp20_amplicon2	13.39	100	14.94
test20	chromothripsis_bp10_amplicon3	13.39	250	37.34
test20	chromothripsis_bp1_amplicon5	13.39	250	37.34
test20	foldback_bp10_amplicon4	13.39	100	14.94
test21	episomal_bp10_amplicon2	13.4	100	14.93
test21	chromothripsis_bp5_amplicon3	13.4	100	14.93
test21	foldback_bp1_amplicon3	13.4	250	37.31
test21	episomal_bp1_amplicon4	13.4	250	37.31
test22	chromothripsis_bp1_amplicon1	13.4	50	7.46
test22	episomal_bp10_amplicon2	13.4	250	37.31
test23	episomal_bp20_amplicon2	13.37	50	7.48
test23	chromothripsis_bp1_amplicon4	13.37	50	7.48
test24	episomal_bp20_amplicon4	13.4	100	14.93
test24	chromothripsis_bp10_amplicon3	13.4	100	14.93
test24	chromothripsis_bp20_amplicon4	13.4	250	37.31
test24	chromothripsis_bp1_amplicon3	13.4	50	7.46
test25	episomal_bp20_amplicon5	13.39	100	14.94
test25	foldback_bp3_amplicon2	13.39	250	37.34
test25	chromothripsis_bp3_amplicon4	13.39	50	7.47
test26	chromothripsis_bp1_amplicon5	13.39	50	7.47
test26	foldback_bp3_amplicon3	13.39	50	7.47
test26	chromothripsis_bp5_amplicon1	13.39	50	7.47
test26	episomal_bp20_amplicon4	13.39	100	14.94
test27	episomal_bp10_amplicon1	13.37	50	7.48
test27	chromothripsis_bp10_amplicon5	13.37	50	7.48
test27	episomal_bp5_amplicon5	13.37	50	7.48
test28	foldback_bp1_amplicon3	13.4	100	14.93
test28	foldback_bp1_amplicon5	13.4	50	7.46
test28	chromothripsis_bp20_amplicon1	13.4	100	14.93
test29	episomal_bp5_amplicon1	13.4	250	37.31
test29	chromothripsis_bp3_amplicon4	13.4	250	37.31
test29	chromothripsis_bp5_amplicon3	13.4	50	7.46
test30	foldback_bp20_amplicon5	13.39	50	7.47
test30	chromothripsis_bp3_amplicon5	13.39	100	14.94
test30	chromothripsis_bp20_amplicon5	13.39	100	14.94
test31	foldback_bp20_amplicon3	13.37	50	7.48
test32	episomal_bp5_amplicon2	13.38	250	37.37
test33	chromothripsis_bp5_amplicon2	13.4	250	37.31
test33	episomal_bp20_amplicon3	13.4	50	7.46
test33	foldback_bp20_amplicon4	13.4	50	7.46
test33	chromothripsis_bp1_amplicon5	13.4	250	37.31
test34	episomal_bp3_amplicon3	13.39	100	14.94
test34	foldback_bp20_amplicon5	13.39	250	37.34
test34	episomal_bp1_amplicon2	13.39	50	7.47
test34	foldback_bp1_amplicon4	13.39	50	7.47
test35	chromothripsis_bp5_amplicon4	13.4	100	14.93
test35	episomal_bp5_amplicon2	13.4	50	7.46
test36	episomal_bp5_amplicon3	13.39	50	7.47
test37	foldback_bp3_amplicon3	13.4	100	14.93
test38	chromothripsis_bp3_amplicon2	13.37	100	14.96
test38	episomal_bp5_amplicon2	13.37	250	37.4
test39	episomal_bp5_amplicon3	13.38	50	7.47
test39	foldback_bp10_amplicon4	13.38	100	14.95
test39	chromothripsis_bp1_amplicon4	13.38	50	7.47
test40	episomal_bp5_amplicon5	13.4	50	7.46
test40	episomal_bp10_amplicon1	13.4	50	7.46
test41	foldback_bp5_amplicon5	13.38	250	37.37
test41	foldback_bp20_amplicon1	13.38	50	7.47
test41	foldback_bp10_amplicon4	13.38	100	14.95
test42	chromothripsis_bp5_amplicon1	13.38	50	7.47
test42	chromothripsis_bp5_amplicon4	13.38	50	7.47
test42	foldback_bp10_amplicon1	13.38	250	37.37
test42	foldback_bp1_amplicon4	13.38	250	37.37
test43	foldback_bp10_amplicon4	13.39	250	37.34
test43	chromothripsis_bp20_amplicon4	13.39	50	7.47
test43	episomal_bp1_amplicon4	13.39	100	14.94
test44	foldback_bp3_amplicon1	13.39	250	37.34
test45	episomal_bp10_amplicon1	13.4	250	37.31
test45	foldback_bp1_amplicon5	13.4	100	14.93
test45	episomal_bp20_amplicon2	13.4	50	7.46
test45	chromothripsis_bp3_amplicon1	13.4	100	14.93
test46	foldback_bp20_amplicon2	13.37	50	7.48
test46	episomal_bp1_amplicon5	13.37	250	37.4
test46	chromothripsis_bp3_amplicon5	13.37	100	14.96
test47	foldback_bp10_amplicon4	13.38	100	14.95
test48	foldback_bp10_amplicon3	13.4	250	37.31
test48	episomal_bp10_amplicon3	13.4	100	14.93
test48	foldback_bp10_amplicon4	13.4	50	7.46
test49	foldback_bp20_amplicon2	13.39	250	37.34
test49	foldback_bp1_amplicon2	13.39	100	14.94
test49	episomal_bp1_amplicon4	13.39	100	14.94
test49	chromothripsis_bp10_amplicon5	13.39	100	14.94
test50	foldback_bp20_amplicon5	13.4	50	7.46
test50	episomal_bp20_amplicon4	13.4	250	37.31
test50	chromothripsis_bp1_amplicon2	13.4	100	14.93
test50	chromothripsis_bp10_amplicon2	13.4	250	37.31
*: ecDNA copy numbers are estimated based on the assumption of diploid genome (CN = 2)
