# Supplementary material for: CoRAL accurately resolves extrachromosomal DNA genome structures with long-read sequencing
Source: Genome Res. 2024 Sep;34(9):1344–54. doi: 10.1101/gr.279131.124 (PMC11529860; doi:10.1101/gr.279131.124)
Supplement: Supplement 2 [file Supplemental_Table_S3.xlsx]

## Sheet: Cell line WGS summary
Supplemental Table S3: Summary of the 10 cell lines used to evaluate CoRAL's reconstruction performance.
Cell line	Cancer subtype	Overall paired-end short read depth	Short read length	Overall long read depth	Long read N50
GBM39 (mono)	Glioblastoma	5.6x	76	15.3x	31528
PC3-DM (mono)	Prostate	10.7x	76	19.0x	27467
PC3-HSR (mono)	Prostate	11.2x	76	18.8x	64220
COLO320-DM (mono)	Colorectal	9.4x	76	13.3x	40133
COLO320-DM (Hung 2021)	Colorectal	0.3x	75	0.6x	20450
COLO320-DM (Wu 2019)	Colorectal	53.1x	151	11.1x	11064
COLO320-HSR (Wu 2019)	Colorectal	59.2x	151	11.2x	12326
GBM39 (Wu 2019)	Glioblastoma	54.6x	151	25.7x	26598
GBM39-HSR (Wu 2019)	Glioblastoma	6.0x	101	2.4x	28479
CHP212	Neuroblastoma	31.6x	151	4.2x	18831
