# Supplementary material for: CoRAL accurately resolves extrachromosomal DNA genome structures with long-read sequencing
Source: Genome Res. 2024 Sep;34(9):1344–54. doi: 10.1101/gr.279131.124 (PMC11529860; doi:10.1101/gr.279131.124)
Supplement: Supplement 3 [file Supplemental_Table_S4.xlsx]

## Sheet: Heaviest cycles
Supplemental Table S4: The heaviest cycle returned by CoRAL, in each of the 10 cell lines.
Sample	Chromosome	Start	End	Orientation	Estimated CN
CHP212	Chr2	11551951	11785247	+	121.41
CHP212	Chr2	12622735	12757957	+	121.41
CHP212	Chr2	14921054	14921210	-	121.41
CHP212	Chr2	15582775	16072476	+	121.41
CHP212	Chr2	12462514	12622527	+	121.41
CHP212	Chr2	11786084	12459661	+	121.41
COLO320-DM (Wu 2019)	Chr8	126425747	126693409	+	80.7666
COLO320-DM (Wu 2019)	Chr8	127738192	127744436	-	80.7666
COLO320-DM (Wu 2019)	Chr8	127738192	127824395	-	80.7666
COLO320-DM (Wu 2019)	Chr8	127750354	127824395	-	80.7666
COLO320-DM (Wu 2019)	Chr8	126694324	127288630	+	80.7666
COLO320-DM (Wu 2019)	Chr8	127327717	127734099	-	80.7666
COLO320-DM (Wu 2019)	Chr8	127290079	127734099	+	80.7666
COLO320-DM (Wu 2019)	Chr8	126626057	127288630	-	80.7666
COLO320-DM (Wu 2019)	Chr13	27807693	27975807	-	80.7666
COLO320-DM (Wu 2019)	Chr16	33543912	33628986	-	80.7666
COLO320-DM (Wu 2019)	Chr8	127848432	127997817	+	80.7666
COLO320-DM (Wu 2019)	Chr8	129265937	129274475	-	80.7666
COLO320-DM (Hung 2021)	Chr6	256518	374265	+	33.0579
COLO320-DM (Hung 2021)	Chr8	127750354	127796500	-	33.0579
COLO320-DM (Hung 2021)	Chr8	126694324	127288630	+	33.0579
COLO320-DM (Hung 2021)	Chr8	127290079	127734099	-	33.0579
COLO320-DM (Hung 2021)	Chr8	127327717	127992850	+	33.0579
COLO320-DM (Hung 2021)	Chr8	127796499	127997817	+	33.0579
COLO320-DM (Hung 2021)	Chr8	129265937	129274475	-	33.0579
COLO320-DM (Hung 2021)	Chr8	126425747	126693409	+	33.0579
COLO320-DM (Hung 2021)	Chr8	127825864	127997817	+	33.0579
COLO320-DM (Hung 2021)	Chr8	129265937	129274475	-	33.0579
COLO320-DM (Hung 2021)	Chr8	126425747	127734099	+	33.0579
COLO320-DM (Hung 2021)	Chr8	126626057	127288630	-	33.0579
COLO320-DM (Hung 2021)	Chr13	27807693	27975805	-	33.0579
COLO320-DM (Hung 2021)	Chr16	33491240	33628984	-	33.0579
COLO320-DM (Hung 2021)	Chr6	256518	382460	+	33.0579
COLO320-DM (Hung 2021)	Chr16	33491240	33626062	-	33.0579
COLO320-DM (mono)	Chr8	126425747	127288630	+	57.9232
COLO320-DM (mono)	Chr8	127290079	127734099	-	57.9232
COLO320-DM (mono)	Chr8	127327717	127734099	+	57.9232
COLO320-DM (mono)	Chr8	126694324	127288630	-	57.9232
COLO320-DM (mono)	Chr8	127750354	127824395	+	57.9232
COLO320-DM (mono)	Chr8	127738192	127997817	+	57.9232
COLO320-DM (mono)	Chr8	129265937	129274475	-	57.9232
COLO320-DM (mono)	Chr8	126425747	126693409	+	57.9232
COLO320-DM (mono)	Chr8	126626057	127744436	-	57.9232
COLO320-DM (mono)	Chr13	27807693	27975807	-	57.9232
COLO320-DM (mono)	Chr16	33543912	33628986	-	57.9232
COLO320-DM (mono)	Chr8	127848432	127997817	+	57.9232
COLO320-DM (mono)	Chr8	129265937	129274475	-	57.9232
COLO320-HSR (Wu 2019)	Chr2	118487190	118487895	+	40.7304
COLO320-HSR (Wu 2019)	Chr8	127327717	127521604	-	40.7304
COLO320-HSR (Wu 2019)	Chr8	127290079	127744436	+	40.7304
COLO320-HSR (Wu 2019)	Chr8	126425747	126693409	-	40.7304
COLO320-HSR (Wu 2019)	Chr8	129265937	129274475	+	40.7304
COLO320-HSR (Wu 2019)	Chr8	127848432	127997817	-	40.7304
COLO320-HSR (Wu 2019)	Chr16	33543912	33628986	+	40.7304
COLO320-HSR (Wu 2019)	Chr13	27807693	27980554	+	40.7304
COLO320-HSR (Wu 2019)	Chr16	32486476	32492905	-	40.7304
COLO320-HSR (Wu 2019)	Chr16	32446055	32484257	-	40.7304
COLO320-HSR (Wu 2019)	Chr16	32446179	32484257	+	40.7304
COLO320-HSR (Wu 2019)	Chr16	32486476	32492905	+	40.7304
COLO320-HSR (Wu 2019)	Chr13	27807693	27980554	-	40.7304
COLO320-HSR (Wu 2019)	Chr16	33491239	33628986	-	40.7304
COLO320-HSR (Wu 2019)	Chr16	33335976	33340032	-	40.7304
COLO320-HSR (Wu 2019)	Chr6	256518	372512	+	40.7304
COLO320-HSR (Wu 2019)	Chr6	371011	382460	+	40.7304
COLO320-HSR (Wu 2019)	Chr16	33543912	33626062	-	40.7304
COLO320-HSR (Wu 2019)	Chr8	127848432	127997817	+	40.7304
COLO320-HSR (Wu 2019)	Chr8	129265937	129274475	-	40.7304
COLO320-HSR (Wu 2019)	Chr8	126425747	126637025	+	40.7304
COLO320-HSR (Wu 2019)	Chr8	127135368	127288630	+	40.7304
COLO320-HSR (Wu 2019)	Chr8	127521584	127734099	-	40.7304
COLO320-HSR (Wu 2019)	Chr3	111555238	111556217	+	40.7304
GBM39 (Wu 2019)	Chr7	54763282	55127266	+	82.3462
GBM39 (Wu 2019)	Chr7	55155021	55609190	+	82.3462
GBM39 (Wu 2019)	Chr7	55610095	56049369	+	82.3462
GBM39 (mono)	Chr7	54763282	55127266	+	112.237
GBM39 (mono)	Chr7	55155021	55609190	+	112.237
GBM39 (mono)	Chr7	55610095	56049369	+	112.237
GBM39-HSR (Wu 2019)	Chr7	54763282	55127266	+	69.5499
GBM39-HSR (Wu 2019)	Chr7	55155021	55609190	+	69.5499
GBM39-HSR (Wu 2019)	Chr7	55610095	56049369	+	69.5499
PC3-DM (mono)	Chr8	111334757	111348271	+	15.7047
PC3-DM (mono)	Chr8	118555462	118724377	+	15.7047
PC3-DM (mono)	Chr8	128553460	128560323	-	15.7047
PC3-DM (mono)	Chr8	123955379	123967668	+	15.7047
PC3-DM (mono)	Chr8	127747527	127804698	-	15.7047
PC3-DM (mono)	Chr8	126375324	126375417	-	15.7047
PC3-DM (mono)	Chr8	137004442	137006141	-	15.7047
PC3-DM (mono)	Chr8	121853389	121951662	-	15.7047
PC3-DM (mono)	Chr8	132851686	132892344	+	15.7047
PC3-DM (mono)	Chr8	133661572	133772577	+	15.7047
PC3-DM (mono)	Chr8	130564881	130726387	-	15.7047
PC3-DM (mono)	Chr8	130455524	130615960	-	15.7047
PC3-DM (mono)	Chr8	141195337	141252091	+	15.7047
PC3-DM (mono)	Chr8	126566566	126641359	+	15.7047
PC3-DM (mono)	Chr8	126248623	126264251	-	15.7047
PC3-DM (mono)	Chr8	121362655	121413203	+	15.7047
PC3-DM (mono)	Chr8	122775491	122781073	+	15.7047
PC3-DM (mono)	Chr8	121441824	121476711	+	15.7047
PC3-DM (mono)	Chr8	137316643	137359057	+	15.7047
PC3-DM (mono)	Chr8	127698520	127699530	-	15.7047
PC3-DM (mono)	Chr8	128596645	128608008	+	15.7047
PC3-DM (mono)	Chr8	122035219	122035316	+	15.7047
PC3-DM (mono)	Chr8	137004442	137072985	-	15.7047
PC3-DM (mono)	Chr8	121853389	121951662	-	15.7047
PC3-DM (mono)	Chr8	132851686	132892344	+	15.7047
PC3-DM (mono)	Chr8	133661572	133824065	+	15.7047
PC3-DM (mono)	Chr8	127717002	127818990	+	15.7047
PC3-DM (mono)	Chr8	130470859	130696951	-	15.7047
PC3-DM (mono)	Chr8	130470859	130491443	-	15.7047
PC3-DM (mono)	Chr8	130455524	130491443	-	15.7047
PC3-DM (mono)	Chr8	141195337	141277957	+	15.7047
PC3-DM (mono)	Chr8	137238900	137273895	-	15.7047
PC3-DM (mono)	Chr8	119051678	119054056	+	15.7047
PC3-DM (mono)	Chr8	138460843	138547407	+	15.7047
PC3-DM (mono)	Chr8	139587757	139636510	-	15.7047
PC3-DM (mono)	Chr8	123228399	123229999	-	15.7047
PC3-DM (mono)	Chr8	127717002	127833402	-	15.7047
PC3-DM (mono)	Chr8	133815913	133824065	-	15.7047
PC3-DM (mono)	Chr8	137161401	137186513	-	15.7047
PC3-DM (mono)	Chr8	123962671	123975866	+	15.7047
PC3-DM (mono)	Chr8	139181755	139366957	+	15.7047
PC3-DM (mono)	Chr8	137135108	137144385	+	15.7047
PC3-DM (mono)	Chr8	131877443	131883198	+	15.7047
PC3-DM (mono)	Chr8	132769878	132775198	+	15.7047
PC3-DM (mono)	Chr8	123955379	124145495	-	15.7047
PC3-DM (mono)	Chr8	128553460	128581193	+	15.7047
PC3-DM (mono)	Chr8	118737195	118834463	+	15.7047
PC3-DM (mono)	Chr8	137210800	137268781	-	15.7047
PC3-DM (mono)	Chr8	138302481	138547407	+	15.7047
PC3-DM (mono)	Chr8	139593439	139636510	-	15.7047
PC3-DM (mono)	Chr8	138244840	138336709	+	15.7047
PC3-DM (mono)	Chr8	111349274	111361078	-	15.7047
PC3-DM (mono)	Chr8	118836082	118931556	-	15.7047
PC3-DM (mono)	Chr8	118542372	118737778	-	15.7047
PC3-DM (mono)	Chr8	136574766	136640756	-	15.7047
PC3-DM (mono)	Chr8	121427963	121435755	+	15.7047
PC3-DM (mono)	Chr8	139324742	139337001	-	15.7047
PC3-DM (mono)	Chr8	122774690	122776267	+	15.7047
PC3-HSR (mono)	Chr8	111334757	111361078	+	23.9867
PC3-HSR (mono)	Chr8	138329977	138336709	-	23.9867
PC3-HSR (mono)	Chr8	132882573	132892344	+	23.9867
PC3-HSR (mono)	Chr8	133661572	133824065	+	23.9867
PC3-HSR (mono)	Chr8	127717002	127855705	+	23.9867
PC3-HSR (mono)	Chr8	144158158	144374532	-	23.9867
PC3-HSR (mono)	Chr8	132853525	132892344	+	23.9867
PC3-HSR (mono)	Chr8	133661572	133824065	+	23.9867
PC3-HSR (mono)	Chr8	127717002	127804698	+	23.9867
PC3-HSR (mono)	Chr8	123955379	123967668	-	23.9867
PC3-HSR (mono)	Chr8	128553460	128647503	+	23.9867
PC3-HSR (mono)	Chr8	136870571	137072985	+	23.9867
PC3-HSR (mono)	Chr8	122035219	122035316	-	23.9867
PC3-HSR (mono)	Chr8	128596645	128608008	-	23.9867
PC3-HSR (mono)	Chr8	127698520	127699530	+	23.9867
PC3-HSR (mono)	Chr8	137316643	137359057	-	23.9867
PC3-HSR (mono)	Chr8	121441824	121476711	-	23.9867
PC3-HSR (mono)	Chr8	122775491	122781073	-	23.9867
PC3-HSR (mono)	Chr8	121362655	121413203	-	23.9867
PC3-HSR (mono)	Chr8	126248623	126264251	+	23.9867
PC3-HSR (mono)	Chr8	126504452	126641359	-	23.9867
PC3-HSR (mono)	Chr8	127793164	127833402	+	23.9867
PC3-HSR (mono)	Chr8	123228399	123229999	+	23.9867
PC3-HSR (mono)	Chr8	139587757	139636510	+	23.9867
PC3-HSR (mono)	Chr8	138388410	138547407	-	23.9867
PC3-HSR (mono)	Chr8	130856163	130873342	+	23.9867
PC3-HSR (mono)	Chr8	138235243	138387101	+	23.9867
PC3-HSR (mono)	Chr8	126310509	126501025	-	23.9867
PC3-HSR (mono)	Chr8	119051678	119114866	-	23.9867
PC3-HSR (mono)	Chr8	137238900	137273895	+	23.9867
PC3-HSR (mono)	Chr8	141195337	141277957	-	23.9867
PC3-HSR (mono)	Chr8	130455524	130855608	+	23.9867
PC3-HSR (mono)	Chr8	118542372	118566016	-	23.9867
PC3-HSR (mono)	Chr8	136574766	136640756	-	23.9867
PC3-HSR (mono)	Chr8	121427963	121435755	+	23.9867
PC3-HSR (mono)	Chr8	139324742	139337001	-	23.9867
PC3-HSR (mono)	Chr8	122774690	122776267	+	23.9867
