# Supplementary material for: CoRAL accurately resolves extrachromosomal DNA genome structures with long-read sequencing
Source: Genome Res. 2024 Sep;34(9):1344–54. doi: 10.1101/gr.279131.124 (PMC11529860; doi:10.1101/gr.279131.124)
Supplement: Supplement 7 [file Supplemental_Table_S1.xlsx]

## Sheet: Simulated ecDNA amplicons
Supplemental Table S1: Characteristics of the 75 simulated 75 cyclic (ecDNA) structures, with varying numbers of breakpoints and varying formation contexts (episomal, chromothripsis or 2-foldback).
ecDNA formation context	Expected number of breakpoints for ecSimulator (*)	Replicate	Number of segments (**)	Maximum multiplicity of segments	Maximum multiplicity of breakpoints
chromothripsis	bp1	amplicon1	9	1	1
chromothripsis	bp1	amplicon2	11	1	1
chromothripsis	bp1	amplicon3	8	1	1
chromothripsis	bp1	amplicon4	10	1	1
chromothripsis	bp1	amplicon5	11	1	1
chromothripsis	bp3	amplicon1	14	2	2
chromothripsis	bp3	amplicon2	10	2	1
chromothripsis	bp3	amplicon3	14	2	2
chromothripsis	bp3	amplicon4	10	1	1
chromothripsis	bp3	amplicon5	12	1	1
chromothripsis	bp5	amplicon1	8	1	1
chromothripsis	bp5	amplicon2	12	2	2
chromothripsis	bp5	amplicon3	12	2	2
chromothripsis	bp5	amplicon4	11	1	1
chromothripsis	bp5	amplicon5	11	2	1
chromothripsis	bp10	amplicon1	14	2	2
chromothripsis	bp10	amplicon2	15	2	2
chromothripsis	bp10	amplicon3	16	2	2
chromothripsis	bp10	amplicon4	18	2	2
chromothripsis	bp10	amplicon5	17	2	2
chromothripsis	bp20	amplicon1	18	3	2
chromothripsis	bp20	amplicon2	20	3	2
chromothripsis	bp20	amplicon3	23	3	3
chromothripsis	bp20	amplicon4	18	4	2
chromothripsis	bp20	amplicon5	15	2	1
episomal	bp1	amplicon1	2	2	1
episomal	bp1	amplicon2	1	1	1
episomal	bp1	amplicon3	1	1	1
episomal	bp1	amplicon4	1	1	1
episomal	bp1	amplicon5	1	1	1
episomal	bp3	amplicon1	3	1	1
episomal	bp3	amplicon2	2	2	1
episomal	bp3	amplicon3	2	2	1
episomal	bp3	amplicon4	3	1	1
episomal	bp3	amplicon5	4	1	1
episomal	bp5	amplicon1	4	2	1
episomal	bp5	amplicon2	3	1	1
episomal	bp5	amplicon3	5	1	1
episomal	bp5	amplicon4	3	2	1
episomal	bp5	amplicon5	4	2	1
episomal	bp10	amplicon1	8	1	1
episomal	bp10	amplicon2	7	2	1
episomal	bp10	amplicon3	7	1	1
episomal	bp10	amplicon4	6	2	1
episomal	bp10	amplicon5	7	4	2
episomal	bp20	amplicon1	9	1	1
episomal	bp20	amplicon2	19	3	3
episomal	bp20	amplicon3	7	3	2
episomal	bp20	amplicon4	9	3	1
episomal	bp20	amplicon5	9	4	2
foldback	bp1	amplicon1	3	1	1
foldback	bp1	amplicon2	2	1	1
foldback	bp1	amplicon3	3	2	1
foldback	bp1	amplicon4	3	1	1
foldback	bp1	amplicon5	2	1	1
foldback	bp3	amplicon1	3	1	1
foldback	bp3	amplicon2	4	1	2
foldback	bp3	amplicon3	4	1	1
foldback	bp3	amplicon4	3	1	1
foldback	bp3	amplicon5	4	1	1
foldback	bp5	amplicon1	6	1	2
foldback	bp5	amplicon2	4	1	1
foldback	bp5	amplicon3	6	1	1
foldback	bp5	amplicon4	5	1	1
foldback	bp5	amplicon5	6	2	2
foldback	bp10	amplicon1	7	1	1
foldback	bp10	amplicon2	9	2	3
foldback	bp10	amplicon3	10	2	2
foldback	bp10	amplicon4	6	2	1
foldback	bp10	amplicon5	12	3	3
foldback	bp20	amplicon1	15	2	2
foldback	bp20	amplicon2	14	2	2
foldback	bp20	amplicon3	11	3	1
foldback	bp20	amplicon4	7	5	3
foldback	bp20	amplicon5	9	2	2
*: The actual number of breakpoints in the resulting structures (from ecSimulator) could deviate from this number
**: Contiguous segments (i.e., sequence edges) connected by concordant edges are merged and counted as one segment
